# Supplementary material for: Results of a Randomized, Double-Blind, Placebo-Controlled, Phase 1b/2 Trial of Nabpaclitaxel + Gemcitabine ± Olaratumab in Treatment-Naïve Participants with Metastatic Pancreatic Cancer
Source: MDPI journal article supplement (doi:10.3390/cancers16071323), 2024-03-28
Supplement: s1 [file s1]

Supplementary Materials:

Table S1. Phase 1: Demographic and baseline characteristics

| Parameter                     | Cohort 1<br>Olaratumab<br>15 mg/kg plus<br>NabPac Gem<br>(N=3) | Cohort 2<br>Olaratumab 20<br>mg/kg plus<br>NabPac Gem<br>(N=7) | Cohort<br>Expansion<br>Olaratumab 20<br>mg/kg plus<br>NabPac Gem<br>(N=12) | Total<br>(N=22)<br>n (%) |
|-------------------------------|----------------------------------------------------------------|----------------------------------------------------------------|----------------------------------------------------------------------------|--------------------------|
| Age, years                    | 73.7±3.8                                                       | 66.1±6.6                                                       | 67.1±10.2                                                                  | 67.7±8.6                 |
| Gender, Male                  | 1 (33.3)                                                       | 4 (57.1)                                                       | 9 (75.0)                                                                   | 14 (63.6)                |
| Race, White                   | 3 (100.0)                                                      | 7 (100.0)                                                      | 12 (100.0)                                                                 | 22 (100.0)               |
| BMI (kg/m <sup>2</sup> )      | 29.9±5.8                                                       | 27.7± 7.0                                                      | 27.2 ±6.7                                                                  | 27.8 ±6.4                |
| Country, USA                  | 1 (33.3)                                                       | 5 (71.4)                                                       | 7 (58.3)                                                                   | 13 (59.1)                |
| Primary tumor<br>present, yes | 3 (100.0)                                                      | 6 (85.7)                                                       | 10 (83.3)                                                                  | 19 (86.4)                |
| ECOG performance<br>status    |                                                                |                                                                |                                                                            |                          |
| 0                             | 2 (66.7)                                                       | 4 (57.1)                                                       | 3 (25.0)                                                                   | 9 (40.9)                 |
| 1                             | 1 (33.3)                                                       | 3 (42.9)                                                       | 9 (75.0)                                                                   | 13 (59.1)                |
| 2-5                           | 0                                                              | 0                                                              | 0                                                                          | 0                        |

Abbreviations: BMI, body mass index; ECOG, Eastern Cooperative Oncology Group; Gem, gemcitabine; N, number of subjects in Safety Population; n, number of subjects within category; NabPac, nabpaclitaxel; SD, standard deviation.

Data are mean±SD or n (%); Data cut-off date = 30 July 2018.

**Table S2. Serious adverse events reported in Phase 1b and Phase 2 of the study**

| Phase 1b                     |                                                       |                                                       |                                                                |                      |                    |                      |
|------------------------------|-------------------------------------------------------|-------------------------------------------------------|----------------------------------------------------------------|----------------------|--------------------|----------------------|
| Preferred term, n (%)        | Cohort 1<br>Olaratumab 15 mg/kg plus NabPac Gem (N=3) | Cohort 2<br>Olaratumab 20 mg/kg plus NabPac Gem (N=7) | Cohort Expansion<br>Olaratumab 20 mg/kg plus NabPac Gem (N=12) |                      | Total (N=22)       |                      |
| Subjects with ≥1 SAE         | 2 (66.7)                                              | 3 (42.9)                                              | 4 (33.3)                                                       |                      | 9 (40.9)           |                      |
| Nausea                       | 0                                                     | 0                                                     | 1 (8.3)                                                        |                      | 1 (4.5)            |                      |
| Pancreatic cyst              | 1 (33.3)                                              | 0                                                     | 0                                                              |                      | 1 (4.5)            |                      |
| Vomiting                     | 0                                                     | 0                                                     | 1 (8.3)                                                        |                      | 1 (4.5)            |                      |
| Asthenia                     | 0                                                     | 0                                                     | 1 (8.3)                                                        |                      | 1 (4.5)            |                      |
| Pyrexia                      | 0                                                     | 0                                                     | 1 (8.3)                                                        |                      | 1 (4.5)            |                      |
| Cerebrovascular accident     | 0                                                     | 0                                                     | 1 (8.3)                                                        |                      | 1 (4.5)            |                      |
| Epilepsy                     | 0                                                     | 1 (14.3)                                              | 0                                                              |                      | 1 (4.5)            |                      |
| Septic shock                 | 1 (33.3)                                              | 0                                                     | 0                                                              |                      | 1 (4.5)            |                      |
| Infusion-related reactions   | 0                                                     | 1 (14.3)                                              | 0                                                              |                      | 1 (4.5)            |                      |
| Neutrophil count decreased   | 1 (33.3)                                              | 0                                                     | 0                                                              |                      | 1 (4.5)            |                      |
| Confusional state            | 1 (33.3)                                              | 0                                                     | 0                                                              |                      | 1 (4.5)            |                      |
| Pneumonitis                  | 0                                                     | 1 (14.3)                                              | 0                                                              |                      | 1 (4.5)            |                      |
| Phase 2                      |                                                       |                                                       |                                                                |                      |                    |                      |
|                              | Olaratumab arm (N=81)                                 |                                                       | Placebo arm (N=78)                                             |                      | Total (N=159)      |                      |
|                              | Any grade<br>n (%)                                    | Grade 3/4/5<br>n (%)                                  | Any grade<br>n (%)                                             | Grade 3/4/5<br>n (%) | Any grade<br>n (%) | Grade 3/4/5<br>n (%) |
| Subjects with ≥1 related SAE | 18 (22.2)                                             | 14 (17.3)                                             | 10 (12.8)                                                      | 9 (11.5)             | 28 (17.6)          | 23 (14.5)            |
| Febrile neutropenia          | 0                                                     | 0                                                     | 1 (1.3)                                                        | 1 (1.3)              | 1 (0.6)            | 1 (0.6)              |
| Cardiac arrest               | 1 (1.2)                                               | 1 (1.2)                                               | 0                                                              | 0                    | 1 (0.6)            | 1 (0.6)              |
| Cardiac failure congestive   | 0                                                     | 0                                                     | 1 (1.3)                                                        | 1 (1.3)              | 1 (0.6)            | 1 (0.6)              |

|                                  |         |         |         |         |         |         |
|----------------------------------|---------|---------|---------|---------|---------|---------|
| Diarrhea                         | 2 (2.5) | 1 (1.2) | 2 (2.6) | 2 (2.6) | 4 (2.5) | 3 (1.9) |
| Vomiting                         | 2 (2.5) | 2 (2.5) | 1 (1.3) | 1 (1.3) | 3 (1.9) | 3 (1.9) |
| Nausea                           | 1 (1.2) | 1 (1.2) | 1 (1.3) | 1 (1.3) | 2 (1.3) | 2 (1.3) |
| Intestinal perforation           | 1 (1.2) | 1 (1.2) | 0       | 0       | 1 (0.6) | 1 (0.6) |
| Colitis                          | 0       | 0       | 1 (1.3) | 1 (1.3) | 1 (0.6) | 1 (0.6) |
| Pyrexia                          | 4 (4.9) | 0       | 1 (1.3) | 0       | 5 (3.1) | 0       |
| Asthenia                         | 1 (1.2) | 1 (1.2) | 0       | 0       | 1 (0.6) | 1 (0.6) |
| Chills                           | 1 (1.2) | 0       | 0       | 0       | 1 (0.6) | 0       |
| Fatigue                          | 1 (1.2) | 0       | 0       | 0       | 1 (0.6) | 0       |
| Sepsis                           | 2 (2.5) | 2 (2.5) | 0       | 0       | 2 (1.3) | 2 (1.3) |
| Pneumonia                        | 1 (1.2) | 1 (1.2) | 1 (1.3) | 1 (1.3) | 2 (1.3) | 2 (1.3) |
| Gastroenteritis                  | 1 (1.2) | 1 (1.2) | 0       | 0       | 1 (0.6) | 1 (0.6) |
| Liver abscess                    | 1 (1.2) | 1 (1.2) | 0       | 0       | 1 (0.6) | 1 (0.6) |
| Pneumocystis jirovecii pneumonia | 1 (1.2) | 1 (1.2) | 0       | 0       | 1 (0.6) | 1 (0.6) |
| Clostridium difficile colitis    | 0       | 0       | 1 (1.3) | 1 (1.3) | 1 (0.6) | 1 (0.6) |
| Pneumonia Klebsiella             | 0       | 0       | 1 (1.3) | 1 (1.3) | 1 (0.6) | 1 (0.6) |
| Platelet count decreased         | 1 (1.2) | 1 (1.2) | 0       | 0       | 1 (0.6) | 1 (0.6) |
| Hyponatremia                     | 1 (1.2) | 0       | 0       | 0       | 1 (0.6) | 0       |
| Myositis                         | 0       | 0       | 1 (1.3) | 1 (1.3) | 1 (0.6) | 1 (0.6) |
| Ischemic cerebral infarction     | 1 (1.2) | 1 (1.2) | 0       | 0       | 1 (0.6) | 1 (0.6) |
| Memory impairment                | 1 (1.2) | 1 (1.2) | 0       | 0       | 1 (0.6) | 1 (0.6) |
| Seizure                          | 1 (1.2) | 1 (1.2) | 0       | 0       | 1 (0.6) | 1 (0.6) |
| Leuko-encephalopathy             | 0       | 0       | 1 (1.3) | 1 (1.3) | 1 (0.6) | 1 (0.6) |
| Dyspnea                          | 1 (1.2) | 1 (1.2) | 0       | 0       | 1 (0.6) | 1 (0.6) |

---

|                     |         |         |         |         |         |         |
|---------------------|---------|---------|---------|---------|---------|---------|
| Respiratory failure | 1 (1.2) | 1 (1.2) | 0       | 0       | 1 (0.6) | 1 (0.6) |
| Pleural effusion    | 0       | 0       | 1 (1.3) | 1 (1.3) | 1 (0.6) | 1 (0.6) |
| Hypotension         | 0       | 0       | 1 (1.3) | 1 (1.3) | 1 (0.6) | 1 (0.6) |

---

Abbreviations: CTCAE, Common Terminology Criteria for Adverse Events; Gem, gemcitabine; N, number of subjects in safety population; n, number of subjects within category; NabPac, nabpaclitaxel; SAE, serious adverse event.

SAEs presented are by maximum CTACE grade categories preferred term by decreasing frequency within system organ class.

**Table S3.** Comparison of olaratumab pharmacokinetic parameter estimates from the previous population PK analysis vs updated population PK analysis

| Parameter Description                                 | Previous Analysis          |                                  | Current Analysis           |                                        |
|-------------------------------------------------------|----------------------------|----------------------------------|----------------------------|----------------------------------------|
|                                                       | Population Estimate (%SEE) | Inter-Patient Variability (%SEE) | Population Estimate (%SEE) | Inter-Patient Variability (%CV (%SEE)) |
| <b>Structural Model</b>                               |                            |                                  |                            |                                        |
| Clearance, CL (L/h)                                   | 0.0186 (1.4)               | 34.6 (9.8)                       | 0.0191 (2.3)               | 36.5 (15.4)                            |
| Central Volume of Distribution, V <sub>1</sub> (L)    | 3.43 (1.1)                 | 26.2 (14)                        | 3.47 (1.1)                 | 28.1 (14.1)                            |
| Peripheral Volume of Distribution, V <sub>2</sub> (L) | 1.62 (9.4)                 | -                                | 1.91 (7.8)                 | -                                      |
| Inter-compartmental clearance rate, Q (L/h)           | 0.0458 (15.0)              | -                                | 0.0412 (20.7)              | -                                      |
| <b>Covariate Effects</b>                              |                            |                                  |                            |                                        |
| WTE <sub>CL</sub> <sup>a</sup>                        | 0.518 (9.1)                | -                                | 0.465 (18.4)               | -                                      |
| WTE <sub>V1</sub> <sup>b</sup>                        | 0.612 (7.7)                | -                                | 0.624 (6.7)                | -                                      |
| TUMR <sub>CL</sub> <sup>a</sup>                       | 0.00106 (15.4)             |                                  | 0.00106 (26.9)             |                                        |
| <b>Residual Error</b>                                 |                            |                                  |                            |                                        |
| Additive (µg/mL)                                      |                            | 25 (25.6)                        |                            | 11.7 (26.8)                            |
| Proportional                                          |                            | 24.7 (5.5)                       |                            | 27.7 (3.9)                             |

Abbreviations: CV, coefficient of variation; PK, pharmacokinetic; POP PK, population PK; SEE, standard error of the estimate; TUMRCL, tumor size effect on clearance; WTECL, body weight effect on clearance; WTEV1, body weight effect on central volume of distribution.

<sup>a</sup>CL<sub>ind</sub> = CL \* ((WTE/76.0)<sup>WTECL</sup>) \* (1 + TUMRCL \* (TUMR-89))

<sup>b</sup>V<sub>1ind</sub> = V<sub>1</sub> \* ((WTE/76.0)<sup>WTEV1</sup>)

Note: Median data from previous POP PK models used. Weight = 76.0 kg and Tumor size = 89 mm.
